# Supplementary material for: Enhanced methane gas storage in the form of hydrates: role of the confined water molecules in silica powders
Source: Royal Society of Chemistry journal article supplement (doi:10.1039/d0ra01754j), 2020-01-01
Supplement: d0ra01754j1.pdf [file d0ra01754j1.pdf]

Supplementary Information

# Enhanced Methane Gas Storage in the form of Hydrates: Role of the Confined Water Molecules in Silica Powders

Pinnelli S.R. Prasad<sup>1,\*</sup>, Burla Sai Kiran<sup>1,2</sup> and Kandadai Sowjanya<sup>1</sup>,

<sup>1</sup>Gas Hydrate Division, CSIR–National Geophysical Research Institute (CSIR–NGRI), HYDERABAD – 500 007 (India)

<sup>2</sup>Academy of Scientific and Innovative Research (AcSIR), CSIR–NGRI Campus, HYDERABAD – 500 007 (India)

Corresponding author's e-mail: [psrprasad@ngri.res.in](mailto:psrprasad@ngri.res.in); Phone: +91 40 2701 2710;

Fax: +91 40 2717 1564

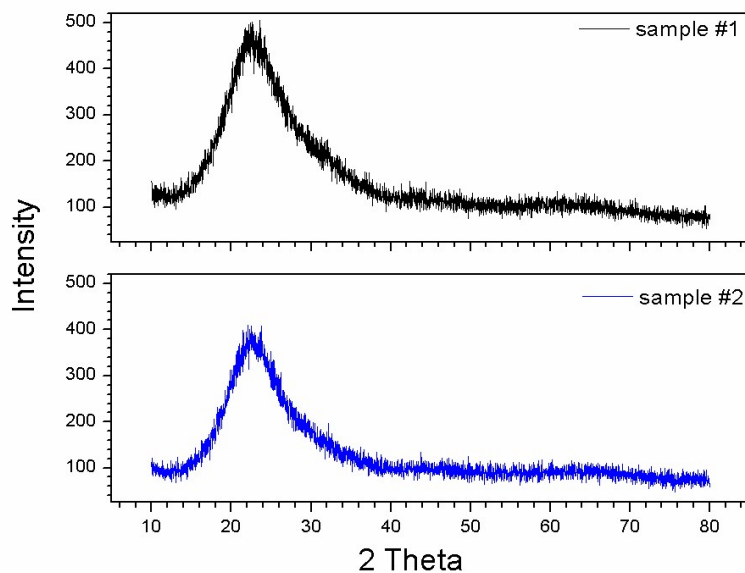

**SI-Figure 1:** Measured powder x-ray diffraction pattern of SiO<sub>2</sub> samples used in the present study.

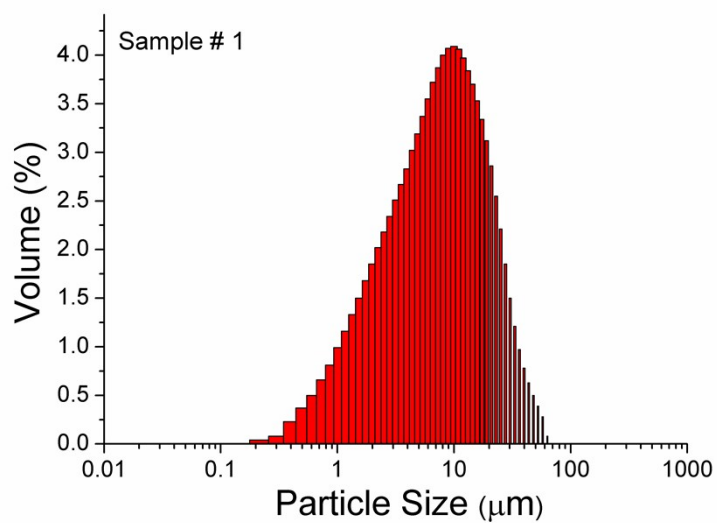

**SI-Figure 2:** The particle size distribution for sample #1 silica. The particle size distribution was measured by dynamic light scattering technique on Mastersizer 2000 instrument.

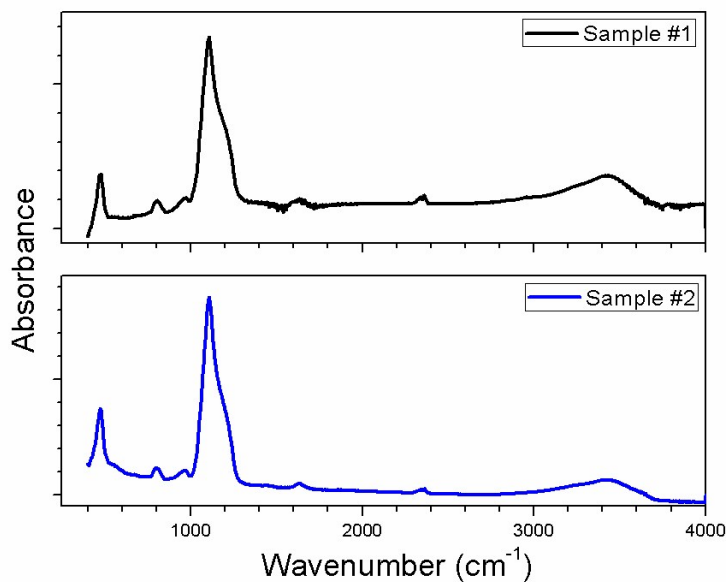

**SI-Figure 3:** FTIR spectrum (measured by KBr pellet method) of SiO<sub>2</sub> samples used in the present study.

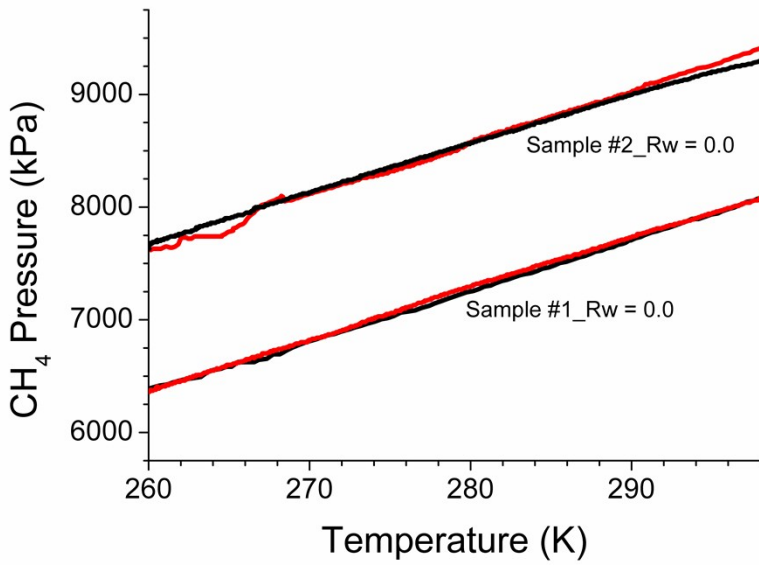

**SI-Figure 4:** The pressure and temperature (p-T) trajectory of dry SiO<sub>2</sub> samples. Black and red curves are the observed behavior during freezing and thawing cycles respectively.

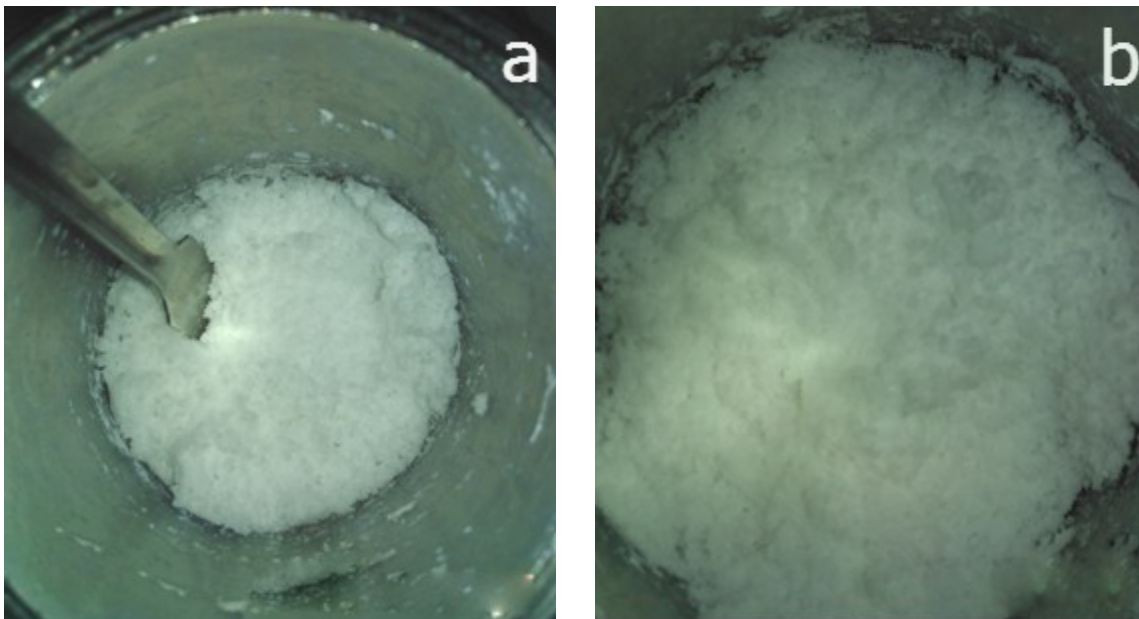

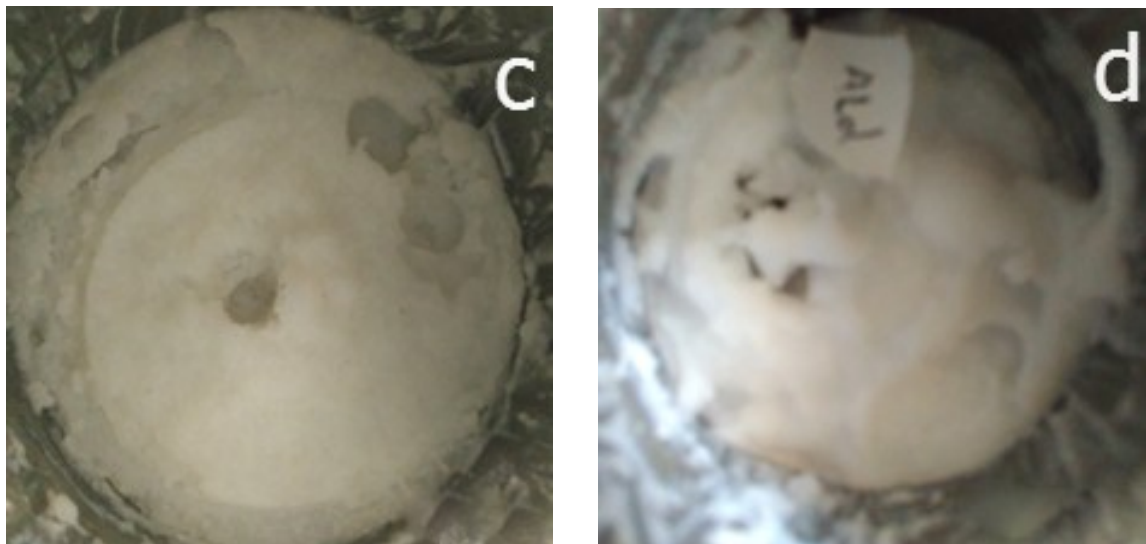

**SI-Figure 5:** Photographs of SiO<sub>2</sub> + H<sub>2</sub>O system. (a) Sample #1,  $R_w = 2.0$ ; (b) Sample #2,  $R_w = 2.0$ ; (c) Sample #1,  $R_w = 2.5$ ; (d) Sample #2,  $R_w = 2.2$ .
